# Supplementary material
Source: publisher figshare collection journal article supplement (https://acs.figshare.com/ndownloader/files/3955339)
Supplement: Supplementary file 1 [file 3955339]

**Supporting Information for “Dynamics of Topological Defects in Single-Walled Carbon Nanotubes during Catalytic Growth” by Juan C. Burgos, Erick Jones, and Perla B. Balbuena**

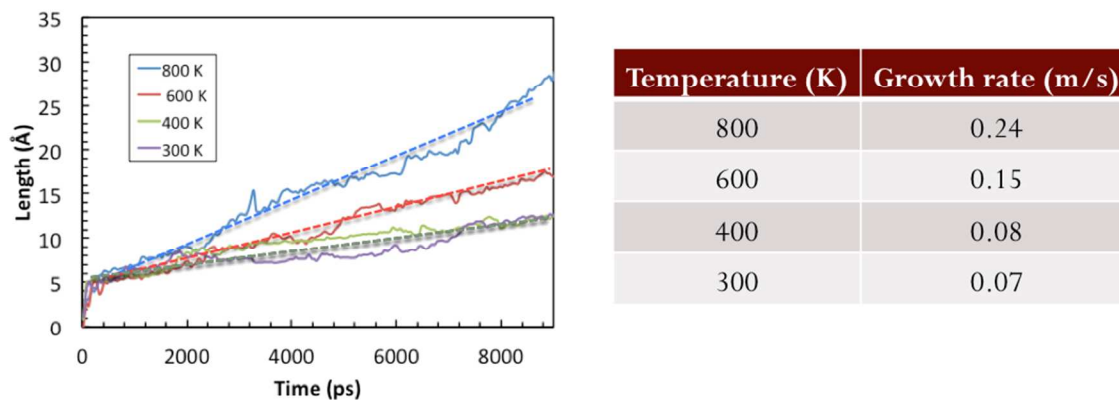

**Figure S1.** Growth rates at different temperatures calculated as the slope of the length vs. time curves.

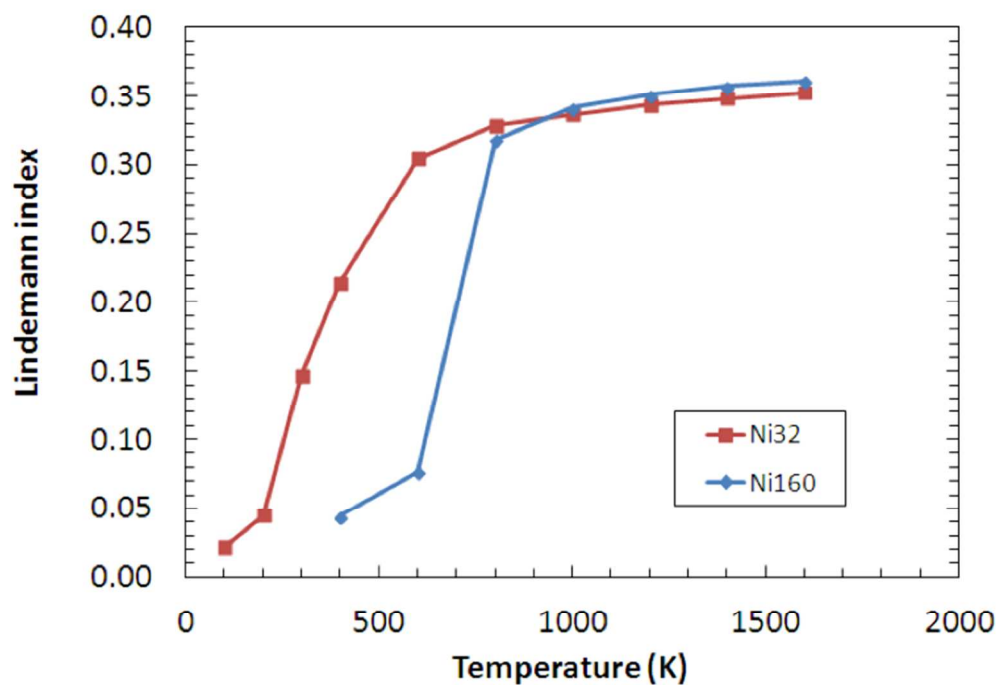

**Figure S2.** Lindemann index calculated for  $\text{Ni}_{32}$  and  $\text{Ni}_{160}$ . Phase transition for  $\text{Ni}_{32}$  calculated at 350 K – 450 K.

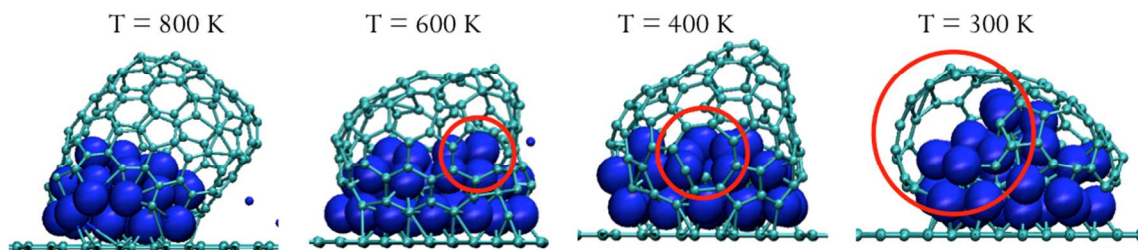

**Figure S3.** Nucleation of defects as a function of temperature. At temperatures below 400 K, limited kinetic energy and diffusion hinders both caps lift off and defects healing, leading to nucleation of amorphous carbon.
